# Supplementary material for: Crystal Structures of the Novel Cytosolic 5′-Nucleotidase IIIB Explain Its Preference for m7GMP
Source: PubMed Central journal article supplement (PMC3946280; doi:10.1371/journal.pone.0090915), 2014-03-06
Supplement: pone.0090915.s004.pdf [file pone.0090915.s004.pdf]

**Table S1:** Oligonucleotides used for site-directed mutagenesis.

| # | Construct | Orientation | Oligonucleotide sequence (5'→3')           |
|---|-----------|-------------|--------------------------------------------|
| 1 | FNWW      | forward     | agtgccctccagttcaatatcttcaacgcctg           |
|   |           | reverse     | caggcgttgaagatattgaaactggagggcact          |
| 2 | HGWW      | forward     | gcagtgccctccagtcacgggatcttcaacgcctg        |
|   |           | reverse     | caggcgttgaagatcccgtgactggagggcactgc        |
| 3 | FGWY      | forward     | gtacatgatcgagtggataccaagtctggcgaactg       |
|   |           | reverse     | cagtcgccagacttggataccactgatcatgtac         |
| 4 | HGWY      |             | construct FGWY with oligonucleotides of #2 |
| 5 | FNWY      |             | construct FGWY with oligonucleotides of #1 |
| 6 | HNWY      |             | construct FGWY with                        |
|   |           | forward     | ggagcagtgccctccagtcacaatatcttcaacgcctgcc   |
|   |           | reverse     | ggcaggcgttgaagatattgtgactggagggcactgctcc   |
